# Supplementary material
Source: publisher figshare collection journal article supplement (https://tandf.figshare.com/articles/dataset/_/3843402)
Supplement: Supplementary file 2 [file 1]

## 微信使用情况与中国大学生政治参与

登陆使用微信是我的日常行为

- ☐ 非常不同意
- ☐ 不同意
- ☐ 有些不同意
- ☐ 保持中立
- ☐ 有些同意
- ☐ 同意
- ☐ 非常同意

我可以自豪地告诉别人我在使用微信

- ☐ 非常不同意
- ☐ 不同意
- ☐ 有些不同意
- ☐ 保持中立
- ☐ 有些同意
- ☐ 同意
- ☐ 非常同意

微信已经变成我日常生活中的一部分了

- ☐ 非常不同意
- ☐ 不同意
- ☐ 有些不同意
- ☐ 保持中立
- ☐ 有些同意
- ☐ 同意
- ☐ 非常同意

如果一段时间不登录微信，我就会感到与外界失去联系

- ☐ 非常不同意
- ☐ 不同意
- ☐ 有些不同意
- ☐ 保持中立
- ☐ 有些同意
- ☐ 同意
- ☐ 非常同意

我觉得我是微信的一分子

- ☐ 非常不同意
- ☐ 不同意
- ☐ 有些不同意
- ☐ 保持中立
- ☐ 有些同意
- ☐ 同意
- ☐ 非常同意

如果微信被关闭了，我会觉得遗憾可惜

- ☐ 非常不同意
- ☐ 不同意
- ☐ 有些不同意
- ☐ 保持中立
- ☐ 有些同意
- ☐ 同意
- ☐ 非常同意

你在微信上浏览关于中国政府反腐败行动的新闻报道与相关信息的频率大概是多少？

- ☐ 我从未在微信上浏览过此类内容
- ☐ 很少浏览
- ☐ 有时浏览
- ☐ 经常浏览
- ☐ 我总是在微信上浏览此类内容

你在微信上转发关于中国政府反腐败行动的新闻与相关信息的频率大概是多少？

- ☐ 我从未在微信上转发过此类内容
- ☐ 很少分享
- ☐ 有时分享
- ☐ 经常分享
- ☐ 我总是在微信上转发此类内容

你在微信上表达自己对中国政府反腐败行动的态度和观点的频率大概是多少？

- ☐ 我从未在微信上表达过自己对该事件的态度和观点
- ☐ 很少表达
- ☐ 有时表达
- ☐ 经常表达
- ☐ 我总是在微信上表达自己对该事件的态度和观点

我使用微信的目的之一：获得乐趣

- ☐ 非常不同意
- ☐ 不同意
- ☐ 有些不同意
- ☐ 保持中立
- ☐ 有些同意
- ☐ 同意
- ☐ 非常同意

我使用微信的目的之一：逃避学习或工作压力

- ☐ 非常不同意
- ☐ 不同意
- ☐ 有些不同意
- ☐ 保持中立
- ☐ 有些同意
- ☐ 同意
- ☐ 非常同意

我使用微信的目的之一：打发时间

- ☐ 非常不同意
- ☐ 不同意
- ☐ 有些不同意
- ☐ 保持中立
- ☐ 有些同意
- ☐ 同意
- ☐ 非常同意

我使用微信的目的之一：让朋友们随时都能联系到我

- ☐ 非常不同意
- ☐ 不同意
- ☐ 有些不同意
- ☐ 保持中立
- ☐ 有些同意
- ☐ 同意
- ☐ 非常同意

我使用微信的目的之一：回复陌生人的信息

- ☐ 非常不同意
- ☐ 不同意
- ☐ 有些不同意
- ☐ 保持中立
- ☐ 有些同意
- ☐ 同意
- ☐ 非常同意

我使用微信的目的之一：随时可以认识添加新的朋友

- ☐ 非常不同意
- ☐ 不同意
- ☐ 有些不同意
- ☐ 保持中立
- ☐ 有些同意
- ☐ 同意
- ☐ 非常同意

我使用微信的目的之一：回复朋友们的信息

- ☐ 非常不同意
- ☐ 不同意
- ☐ 有些不同意
- ☐ 保持中立
- ☐ 有些同意
- ☐ 同意
- ☐ 非常同意

我使用微信的目的之一：通过创建某个微信群或者加入某个微信群能够获得归属感

- ☐ 非常不同意
- ☐ 不同意
- ☐ 有些不同意
- ☐ 保持中立
- ☐ 有些同意
- ☐ 同意
- ☐ 非常同意

我使用微信的目的之一：获得尊重与支持

- ☐ 非常不同意
- ☐ 不同意
- ☐ 有些不同意
- ☐ 保持中立
- ☐ 有些同意
- ☐ 同意
- ☐ 非常同意

我使用微信的目的之一：塑造个人形象

- ☐ 非常不同意
- ☐ 不同意
- ☐ 有些不同意
- ☐ 保持中立
- ☐ 有些同意
- ☐ 同意
- ☐ 非常同意

我使用微信的目的之一：让自己看起来有格调

- ☐ 非常不同意
- ☐ 不同意
- ☐ 有些不同意
- ☐ 保持中立
- ☐ 有些同意
- ☐ 同意
- ☐ 非常同意

我使用微信的目的之一：让自己看起来紧跟潮流

- ☐ 非常不同意
- ☐ 不同意
- ☐ 有些不同意
- ☐ 保持中立
- ☐ 有些同意
- ☐ 同意
- ☐ 非常同意

我使用微信的目的之一：让自己看起来与众不同

- ☐ 非常不同意
- ☐ 不同意
- ☐ 有些不同意
- ☐ 保持中立
- ☐ 有些同意
- ☐ 同意
- ☐ 非常同意

我使用微信的目的之一：分享我的立场、态度观点和价值观

- ☐ 非常不同意
- ☐ 不同意
- ☐ 有些不同意
- ☐ 保持中立
- ☐ 有些同意
- ☐ 同意
- ☐ 非常同意

我使用微信的目的之一：感受到朋友们对我的关注或关心

- ☐ 非常不同意
- ☐ 不同意
- ☐ 有些不同意
- ☐ 保持中立
- ☐ 有些同意
- ☐ 同意
- ☐ 非常同意

我使用微信的目的之一：和朋友们分享谈资话题

- ☐ 非常不同意
- ☐ 不同意
- ☐ 有些不同意
- ☐ 保持中立
- ☐ 有些同意
- ☐ 同意
- ☐ 非常同意

我使用微信的目的之一：让朋友们感受到我对他们的关注或关心

- ☐ 非常不同意
- ☐ 不同意
- ☐ 有些不同意
- ☐ 保持中立
- ☐ 有些同意
- ☐ 同意
- ☐ 非常同意

我使用微信的目的之一：扩充自己的知识储备

- ☐ 非常不同意
- ☐ 不同意
- ☐ 有些不同意
- ☐ 保持中立
- ☐ 有些同意
- ☐ 同意
- ☐ 非常同意

我使用微信的目的之一：完善我的思考，让我的思考更加多元，更加全面，更加深刻

- ☐ 非常不同意
- ☐ 不同意
- ☐ 有些不同意
- ☐ 保持中立
- ☐ 有些同意
- ☐ 同意
- ☐ 非常同意

我使用微信的目的之一：为了发现这个社会正在发生着什么

- ☐ 非常不同意
- ☐ 不同意
- ☐ 有些不同意
- ☐ 保持中立
- ☐ 有些同意
- ☐ 同意
- ☐ 非常同意

我使用微信的目的之一：为了理解正在发生的事件

- ☐ 非常不同意
- ☐ 不同意
- ☐ 有些不同意
- ☐ 保持中立
- ☐ 有些同意
- ☐ 同意
- ☐ 非常同意

你在微信上发帖的频率大概是多少：

- ☐ 我从未在微信上发帖
- ☐ 很少发帖
- ☐ 有时发帖
- ☐ 经常发帖
- ☐ 我总是在微信上发帖

你在微信上转发帖子的频率大概是多少：

- ☐ 我从未在微信上转发过任何帖子
- ☐ 很少转发
- ☐ 有时转发
- ☐ 经常转发
- ☐ 我总是在微信上转发帖子

你在微信上点赞的频率是多少？

- ☐ 我从未点赞过
- ☐ 很少点赞
- ☐ 有时点赞
- ☐ 经常点赞
- ☐ 我总是在点赞

你在微信上浏览帖子的频率是多少？

- ☐ 我从未浏览过帖子
- ☐ 很少浏览
- ☐ 有时浏览
- ☐ 经常浏览
- ☐ 我总是在浏览帖子

你最近一次生日的时候是多少岁：



你的性别是：

☐ 男性

☐ 女性
